# Supplementary material for: Toughening of amorphous poly(propylene carbonate) by rubbery CO2-based polyurethane: transition from brittle to ductile
Source: Royal Society of Chemistry journal article supplement (doi:10.1039/c5ra07142a), 2015-01-01
Supplement: c5ra07142a1.pdf [file c5ra07142a1.pdf]

## Supplementary data

### Toughening of Amorphous Poly(propylene carbonate) by Rubbery CO<sub>2</sub>-based

#### Polyurethane: Transition from Brittle to Ductile

Guanjie Ren<sup>ab</sup>, Yuyang Miao<sup>a</sup>, Iijun Qiao<sup>a</sup>, Yusheng Qin<sup>\*a</sup>, Xianhong Wang<sup>\*\*a</sup>,

Fosong Wang<sup>a</sup>

<sup>a</sup> Key Laboratory of Polymer Ecomaterials, Changchun Institute of Applied Chemistry, Chinese Academy of Sciences, Changchun 130022, People's Republic of China.

<sup>b</sup> University of Chinese Academy of Sciences, Beijing 100039, People's Republic of China

\* CORRESPONDING AUTHOR: Dr. Yusheng Qin

Fax: +86 431 85262252; Tel: +86 431 85262252; E-mail: ysqin@ciac.ac.cn

\*\* CORRESPONDING AUTHOR: Prof. Xianhong Wang

Fax: +86 431 85689095; Tel: +86 431 85262250; E-mail: xhwang@ciac.ac.cn

#### Contents:

General information

Fig. S1. FTIR of CO<sub>2</sub>-based diol and PCO<sub>2</sub>PU2

Fig. S2. <sup>1</sup>H NMR of PCO<sub>2</sub>PU2

Fig. S3. <sup>13</sup>C NMR of PCO<sub>2</sub>PU2

Fig. S4. Dynamic frequency sweeps of PPC and PPC/PCO<sub>2</sub>PU1 with various compositions at 1% strains. (a)  $G'$ , (b)  $G''$ , (c)  $|\eta^*|$

Fig. S5. Dynamic frequency sweeps of PPC and PPC/PCO<sub>2</sub>PU2 with various compositions at 1% strains. (a)  $G'$ , (b)  $G''$ , (c)  $|\eta^*|$

Table S1. Diameters of PPC/PCO<sub>2</sub>PU blends with various loadings

#### General information

FT-IR spectra of the samples were recorded on a Bruker TENSOR-27 spectrophotometer with spectral resolution of 2 cm<sup>-1</sup>, where the sample solutions were casted onto a KBr disk and

dried in vacuum at room temperature. NMR spectra were collected at ambient temperatures using a Bruker ARX-300 spectrometer at room temperature in deuterated chloroform ( $\text{CDCl}_3$ ). Rheological measurements were performed at 140 °C using a AR 2000 (TA, USA) rheometer with a parallel plate geometry and 25 mm plate diameters. The dynamic frequency sweeps were performed from 0.01 to 100 rad/s at a small strain of 1% within the linear viscoelastic zone. The rubber particle size from the TEM was calculated using Nanomeasure software. The number and weight average rubber particle sizes were calculated using the following equations.

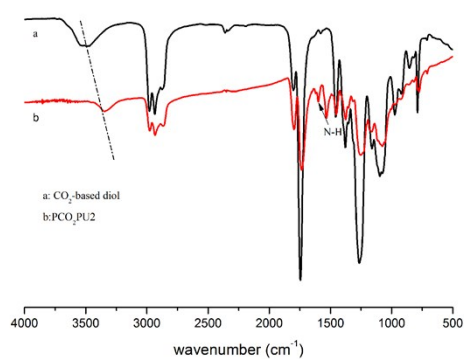

**Fig. S1.** FTIR of  $\text{CO}_2$ -based diol and  $\text{PCO}_2\text{PU}_2$

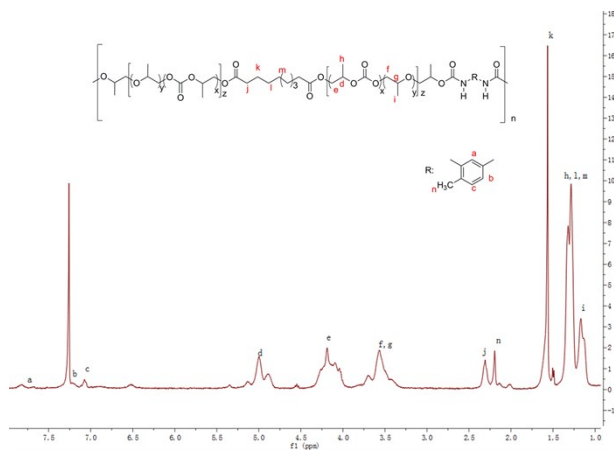

**Fig. S2.**  $^1\text{H}$  NMR of  $\text{PCO}_2\text{PU}_2$

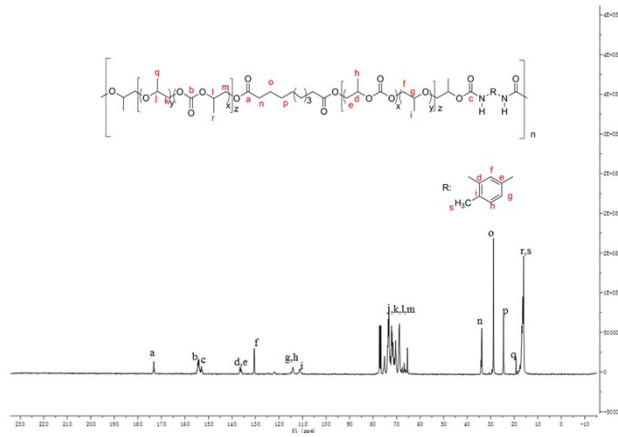

**Fig. S3.** <sup>13</sup>C NMR of PCO<sub>2</sub>PU2

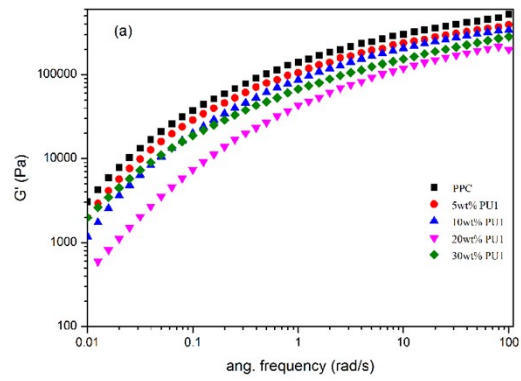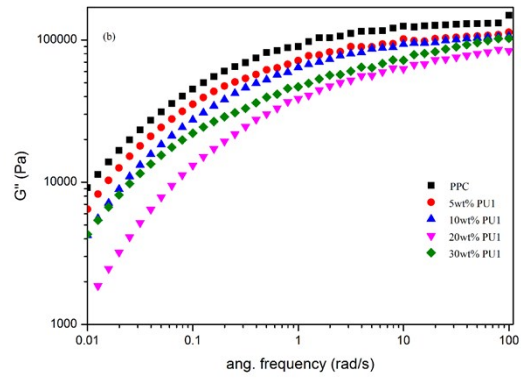

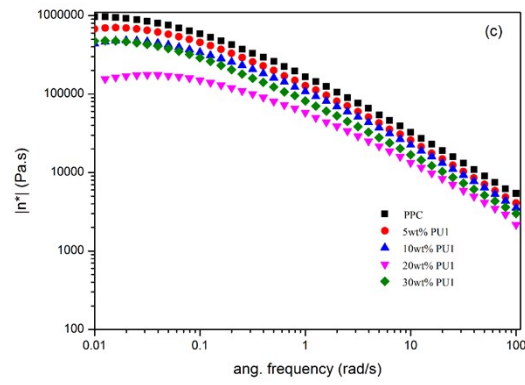

**Fig. S4.** Dynamic frequency sweeps of PPC and PPC/PCO<sub>2</sub>PU1 with various compositions at 1% strains. (a)  $G'$ , (b)  $G''$ , (c)  $|\eta^*|$

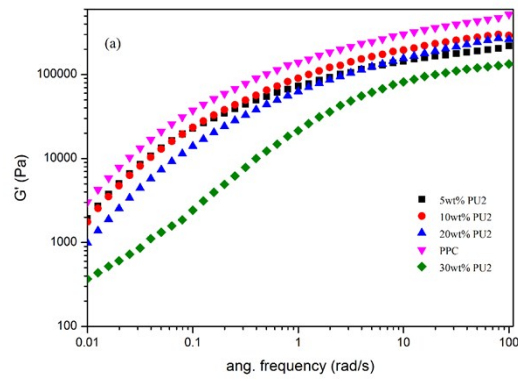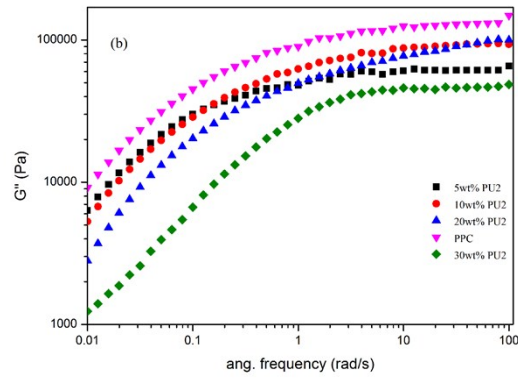

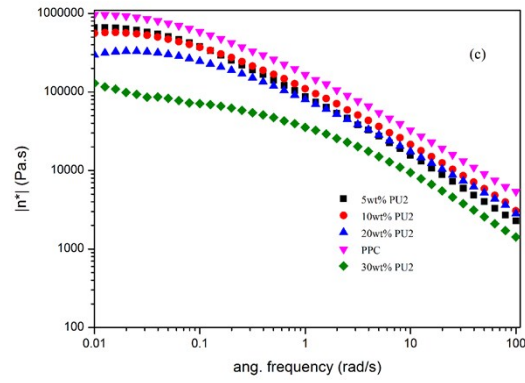

**Fig. S5.** Dynamic frequency sweeps of PPC and PPC/PCO<sub>2</sub>PU2 with various compositions at 1% strains. (a)  $G'$ , (b)  $G''$ , (c)  $|\eta^*|$

**Table S1.** Diameters of PPC/PCO<sub>2</sub>PU blends with various loadings

|                          | Wr  | $D_n$ ( $\mu\text{m}$ ) | $D_w$ ( $\mu\text{m}$ ) | $D_w/D_n$ |
|--------------------------|-----|-------------------------|-------------------------|-----------|
| PPC/PCO <sub>2</sub> PU1 | 10% | 0.058                   | 0.066                   | 1.13      |
| PPC/PCO <sub>2</sub> PU1 | 15% | 0.088                   | 0.091                   | 1.03      |
| PPC/PCO <sub>2</sub> PU1 | 20% | 0.163                   | 0.202                   | 1.23      |
| PPC/PCO <sub>2</sub> PU2 | 10% | 0.049                   | 0.052                   | 1.06      |
| PPC/PCO <sub>2</sub> PU2 | 15% | 0.051                   | 0.056                   | 1.09      |
| PPC/PCO <sub>2</sub> PU2 | 20% | 0.100                   | 0.111                   | 1.11      |
